# Supplementary material for: A Novel POP-Ni Catalyst Derived from PBTP for Ambient Fixation of CO2 into Cyclic Carbonates
Source: Materials (Basel). 2023 Mar 7;16(6):2132. doi: 10.3390/ma16062132 (PMC10057775; doi:10.3390/ma16062132)
Supplement: Supplementary file 1 [file materials-16-02132-s001.zip › materials-2245437-supplementary.pdf]

# A Novel POP-Ni Catalyst Derived from PBTP for Ambient Fixation of CO<sub>2</sub> into Cyclic Carbonates

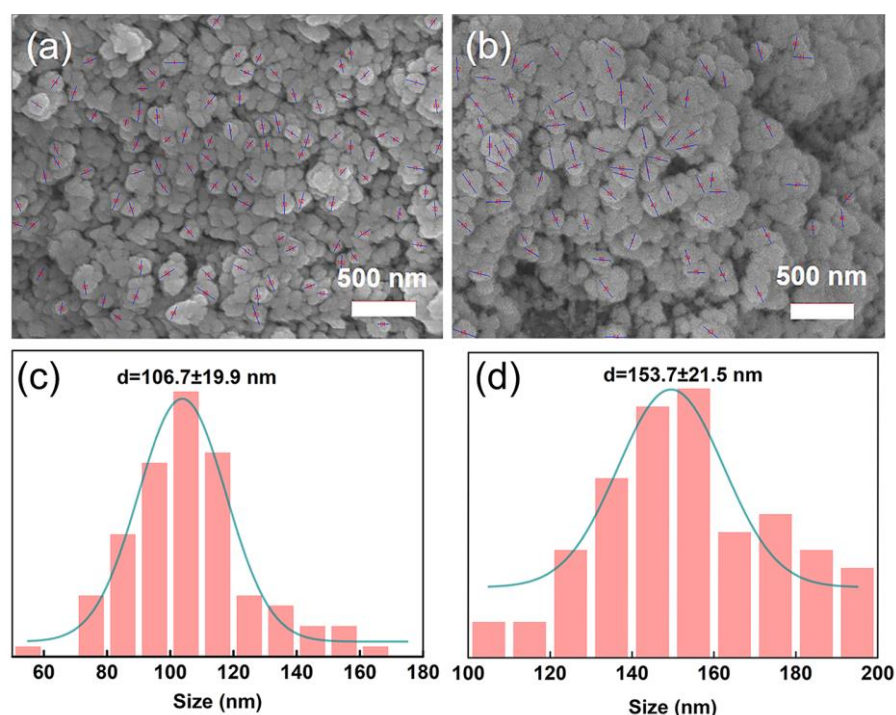

**Figure S1.** SEM image of PBTP (a) and POP-Ni (b); particle size distribution diagram of PBTP (c) and POP-Ni (d).

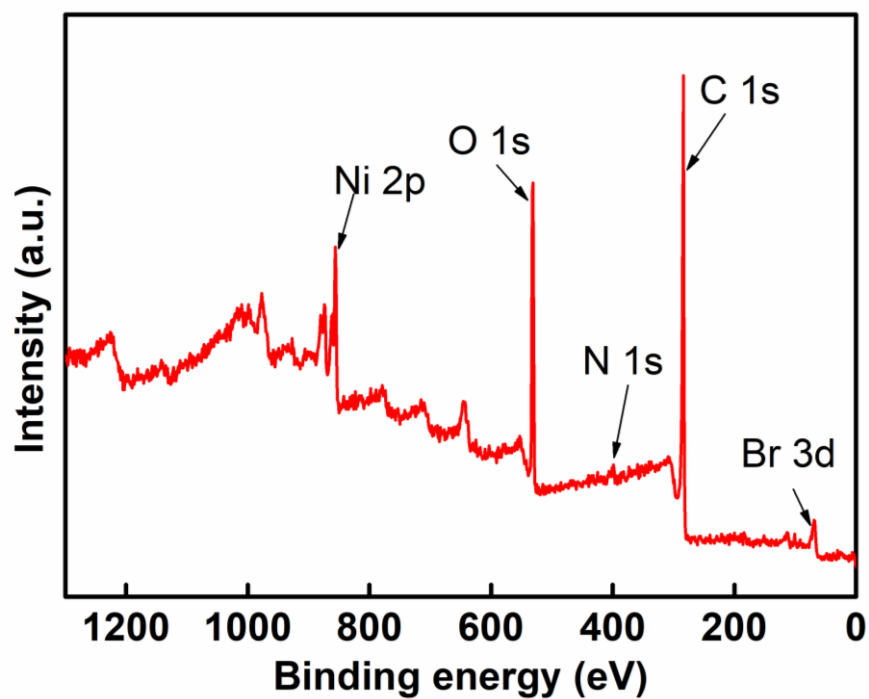

Figure S2. XPS spectrum of POP-Ni.

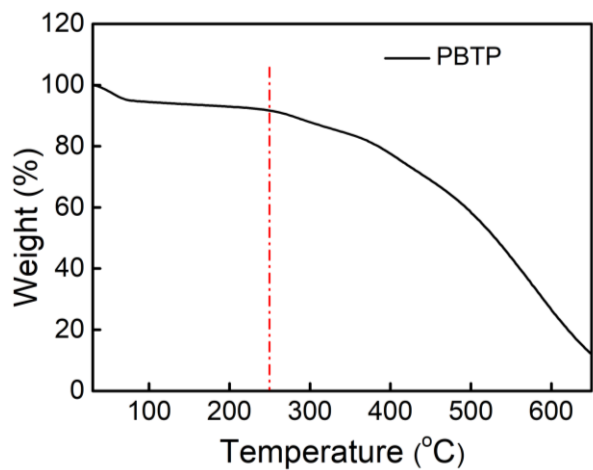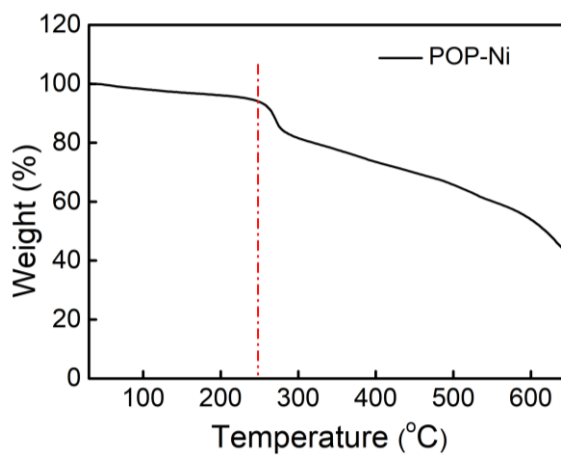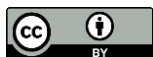

Copyright: © 2023 by the authors. Licensee MDPI, Basel, Switzerland. This article is an open access article distributed under the terms and conditions of the Creative Commons Attribution (CC BY) license (<https://creativecommons.org/licenses/by/4.0/>).

(a)

(b)

Figure S3. (a) TGA profile of PBTP; (b) TGA profile of POP-Ni.

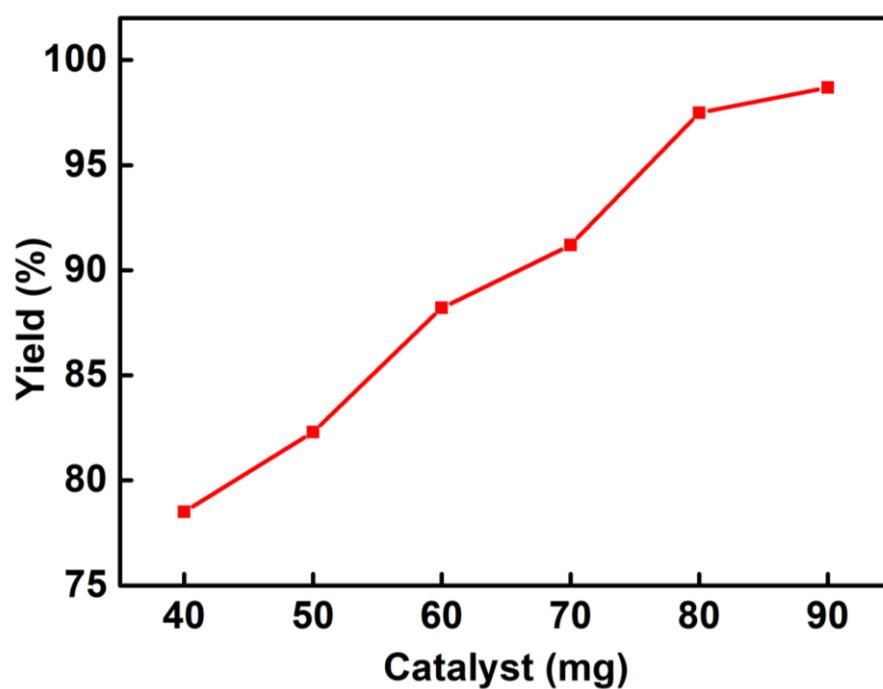

Figure S4. The catalytic activity corresponding to different catalyst amounts.

Table S1. Screening on the substrate scope for CO<sub>2</sub> cycloaddition with POP-Ni catalyst <sup>a</sup>.

| Entry | Epoxide                                                                             | Product <sup>b</sup>                                                                 | Major by-product <sup>b</sup>                                                         |
|-------|-------------------------------------------------------------------------------------|--------------------------------------------------------------------------------------|---------------------------------------------------------------------------------------|
| 1     | 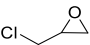 | 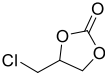 | ---                                                                                   |
| 2     | 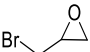 | 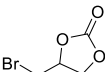 | ---                                                                                   |
| 3     | 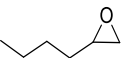 | 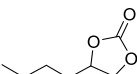 | ---                                                                                   |
| 4     | 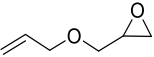 | 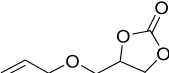 | 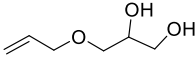 |
| 5     | 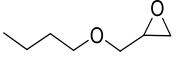 | 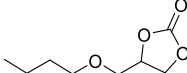 | 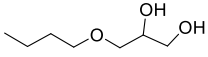 |
| 6     | 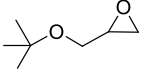 | 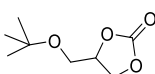 | 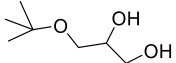 |
| 7     | 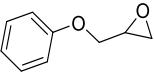 | 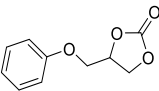 | 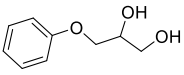 |

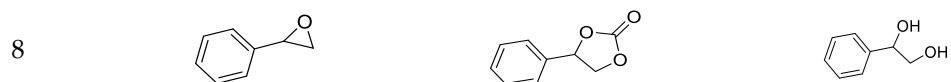

<sup>a</sup> Reaction condition: 5 mmol of epoxide, 80 mg of POP-Ni, 0.5 mL of DMF, CO<sub>2</sub> (balloon), 80 °C and 24 h.

<sup>b</sup> Determined by GC-MS.

**Table S2.** Recyclability of catalyst POP-Ni.

| Cycles | Yield (%) | Selectivity (%) |
|--------|-----------|-----------------|
| 1      | 97.5      | > 99            |
| 2      | 95.8      | > 99            |
| 3      | 94.2      | > 99            |
| 4      | 92.2      | > 99            |
| 5      | 92.4      | > 99            |
| 6      | 91.5      | > 99            |

Reaction conditions: epichlorohydrin (5 mmol), POP-Ni (80 mg), 0.5 ml of DMF, CO<sub>2</sub> balloon, 24 h. The mixture was kept stirring at 80 °C for 24 h. Determined by GC-MS analysis of crude reaction samples.

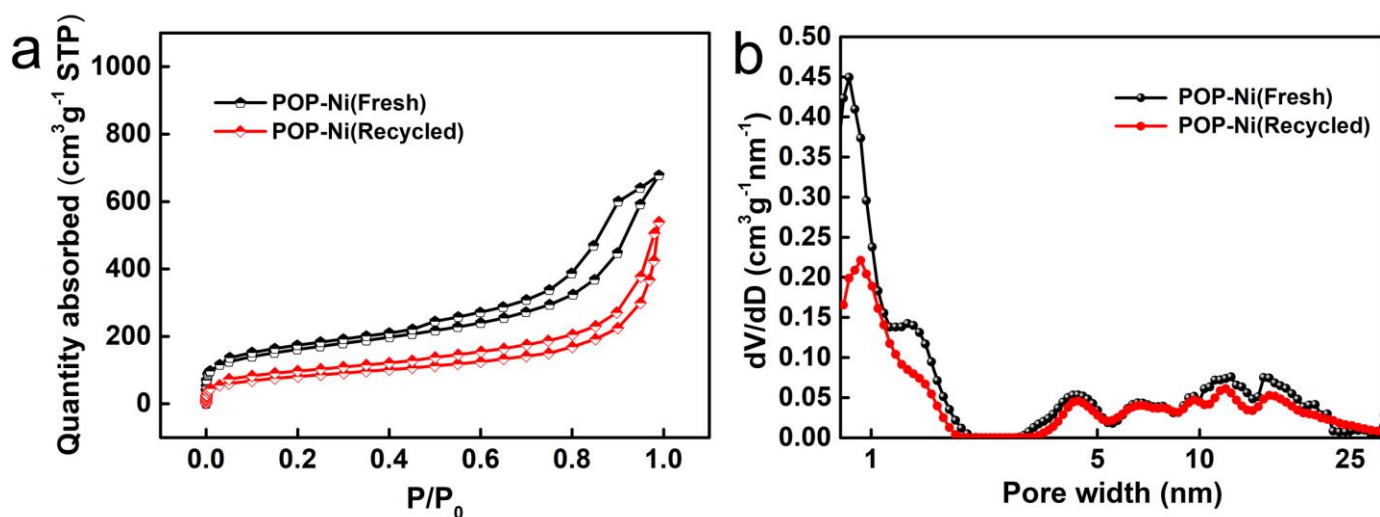

**Figure S5.** N<sub>2</sub> adsorption/desorption isotherm (a) and pore size distribution (b) of POP-Ni (fresh) and POP-Ni (recycled catalyst after the fourth run).

**Disclaimer/Publisher's Note:** The statements, opinions and data contained in all publications are solely those of the individual author(s) and contributor(s) and not of MDPI and/or the editor(s). MDPI and/or the editor(s) disclaim responsibility for any injury to people or property resulting from any ideas, methods, instructions or products referred to in the content.
